# Supplementary material for: Visible light-based 3D bioprinted composite scaffolds of κ-carrageenan for bone tissue engineering applications
Source: Royal Society of Chemistry journal article supplement (doi:10.1039/d3tb02179c), 2024-01-01
Supplement: d3tb02179c1.pdf [file d3tb02179c1.pdf]

# Supporting Information

## Visible Light-based 3D Bioprinted Composite Scaffolds of $\kappa$ -Carrageenan for Bone Tissue Engineering

*Sushma Kumari<sup>1,2†\*</sup>, Pritiranjana Mondal<sup>1†</sup>, Suhela Tyeb<sup>1</sup>, and Kaushik Chatterjee<sup>1\*</sup>*

<sup>1</sup>Department of Materials Engineering, Indian Institute of Science, C.V. Raman Avenue,  
Bangalore 560012, India

Current Address: <sup>2</sup>Centre for Biomaterials, Cellular and Molecular Theranostics (CBCMT),  
Vellore Institute of Technology, Vellore 632014, Tamil Nadu, India

<sup>†</sup>**Contributed equally**

**\*Corresponding Author**

Email: [kchatterjee@iisc.ac.in](mailto:kchatterjee@iisc.ac.in); Tel.: +91-80-22933408

Email: [sushmakumari86@gmail.com](mailto:sushmakumari86@gmail.com)

17

18

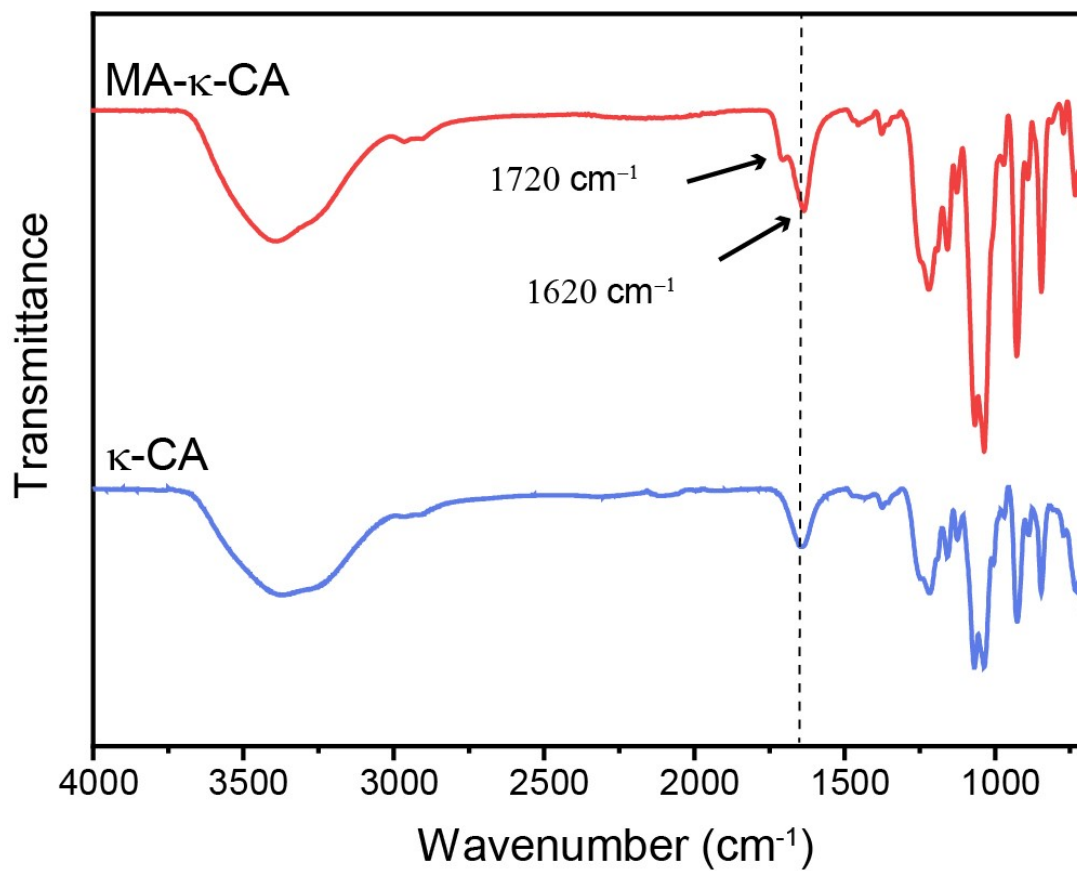

19

20 **Figure S1.** The FTIR spectra of the native  $\kappa$ -CA and chemically functionalized MA- $\kappa$ -CA with  
21 C=C (stretching vibration) at  $1620\text{ cm}^{-1}$  and C=O (stretching vibration for ester) at  $1720\text{ cm}^{-1}$ .

22

23

24

25

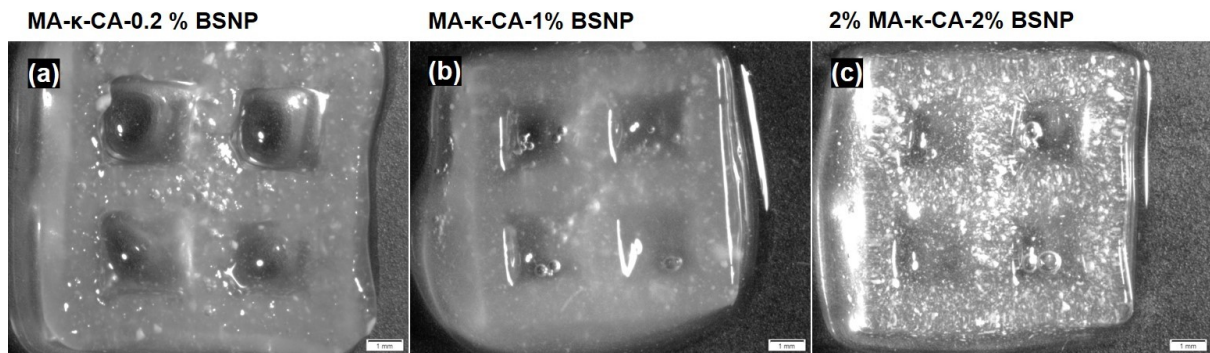

26

27 **Figure S2.** Effect of BSNP concentration on the printability of photocurable printing precursor  
28 solution of 2% w/v MA-κ-CA, mixed with (a) 0.2 % BSNP, (b) 1 % BSNP, and 2 % BSNP.  
29 Dimensions of hydrogel grid are  $8 \times 8 \times 2 \text{ mm}^3$ . Scale bars: 1 mm.

30

31

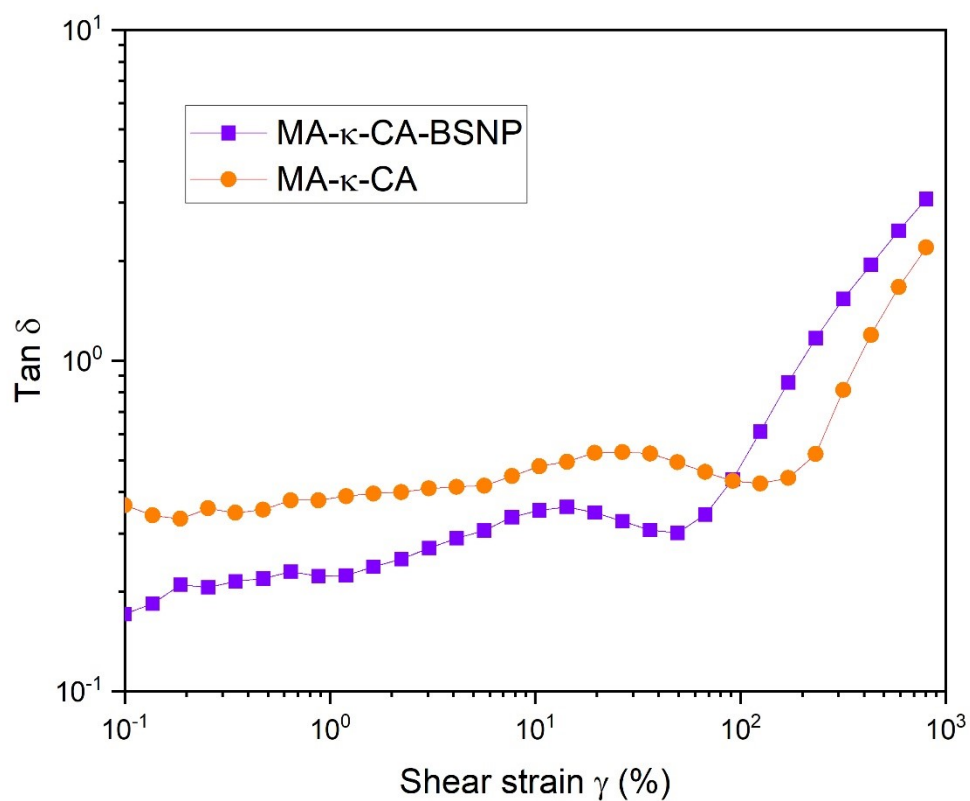

33

34 **Figure S3.** Graphical representation of  $\text{tan } \delta$  as a function of shear strain for the DLP printed  
35 hydrogels of 2% MA- $\kappa$ -CA and composite 2% MA- $\kappa$ -CA-BSNP.

36

37

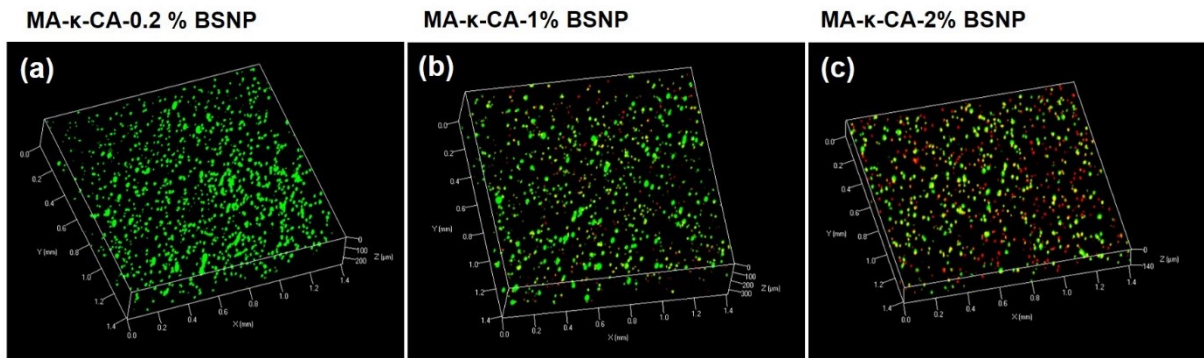

38

39 **Figure S4.** The cytotoxicity effect of BSNP concentration on the DLP printing of MC3T3-E1  
40 osteoblast cells mixed with (a) MA-κ-CA-0.2% BSNP, (b) MA-κ-CA-1% BSNP, and (c) MA-  
41 κ-CA-2% BSNP to fabricate cell-laden composite hydrogels. Merged live/dead 3D  
42 fluorescence images of MC3T3-E1 osteoblasts, stained with calcein AM (live cells: green) and  
43 ethidium homodimer I (dead cells: red) on day 2.

44

45

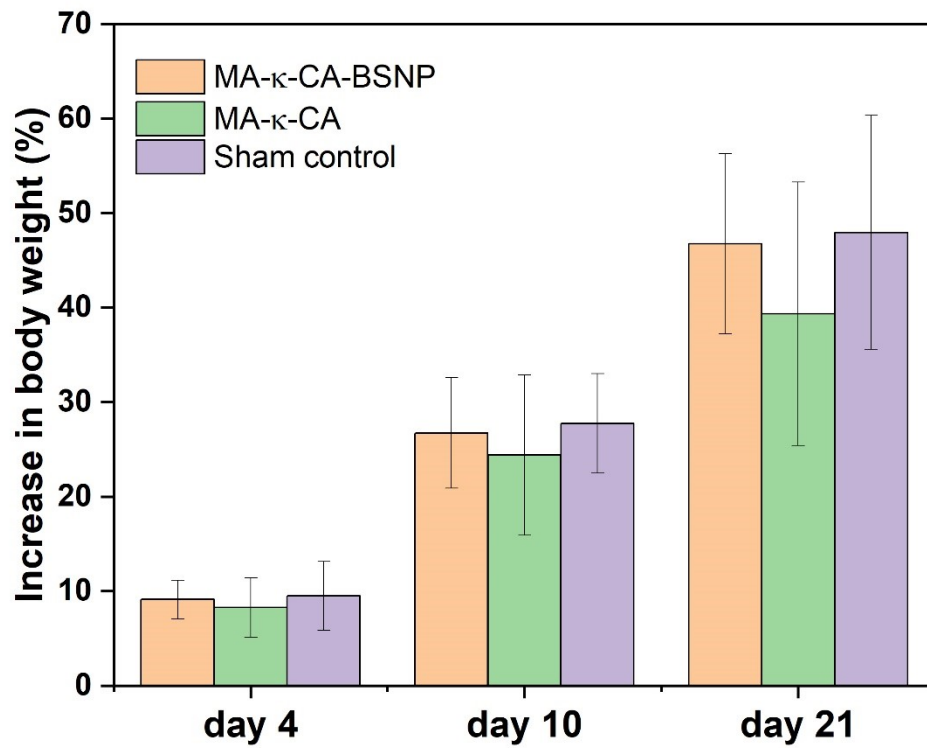

47

48 **Figure S5.** Increase of body weight of the rat of all group.

49

50

51

52

53

54

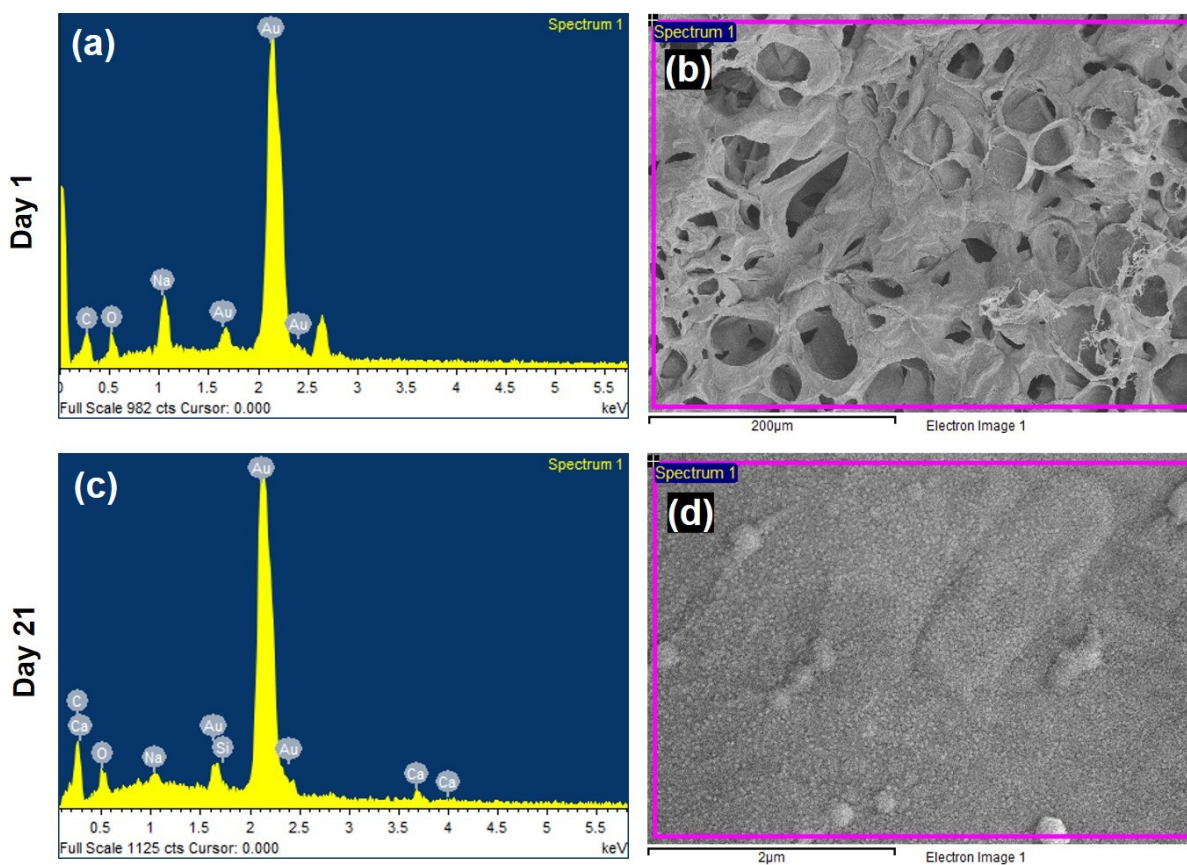

55

56 **Figure S6.** SEM-EDS analysis for the DLP printed MC3T3-E1 osteoblast cell-laden MA-κ-  
57 CA-BSNP composite hydrogels on (a-b) day 1 and (c-d) day 21.

58

59

60

62 **Table S1:** Hematological studies of sham control, MA-κ-CA hydrogel and MA-κ-CA-BSNP  
 63 composite hydrogel -treated group

|           |                      | RBC<br>(10 <sup>6</sup><br>/μl) | Hemogl<br>obin<br>(g/dL) | MC<br>V<br>(fL) | MC<br>H<br>(pg)    | MC<br>HC<br>(g/d<br>L) | PCV<br>(%)    | TLC<br>(cells/<br>mm <sup>3</sup> ) | SGPT<br>(U/Lt)  | SGOT<br>(U/Lt) | Creatini<br>ne<br>(mg/dL) |
|-----------|----------------------|---------------------------------|--------------------------|-----------------|--------------------|------------------------|---------------|-------------------------------------|-----------------|----------------|---------------------------|
| Day<br>4  | SHAM                 | 5.5<br>±1.8                     | 12.1<br>±1.2             | 68.1<br>± 4.8   | 18.4<br>5 ±<br>2.5 | 29.8<br>± 3.1          | 41.6<br>± 1.5 | 4550<br>± 353                       | 85.4 ±<br>2.3   | 269 ±<br>13.9  | 0.11                      |
|           | MA-κ-<br>CA          | 6.0 ±<br>2.2                    | 12 ±1.5                  | 70.2<br>± 6.9   | 17.9<br>± 1.3      | 25.6<br>± 1.5          | 46.8<br>± 2.2 | 5933<br>± 757                       | 80.8 ±<br>7.8   | 265 ±<br>35.9  | 0.12                      |
|           | MA-κ-<br>CA-<br>BSNP | 6.8 ±<br>2.3                    | 13.4 ±<br>2.6            | 60.1<br>± 5.8   | 19.7<br>± 2.1      | 32.8<br>± 2.9          | 40.8<br>± 3.5 | 4600<br>± 658                       | 81.9 ±<br>10.8  | 287.7±<br>50   | 0.14                      |
| Day<br>10 | SHAM                 | 8.3 ±<br>2.2                    | 16.2 ±<br>3.7            | 58.9<br>± 6.5   | 19.5<br>± 2.5      | 33.2<br>± 4.2          | 48.7<br>± 23  | 4200<br>± 671                       | 98.8 ±<br>2.19  | 246.4 ±<br>7.7 | 0.7                       |
|           | MA-κ-<br>CA          | 6.9 ±<br>1.7                    | 13.7 ±<br>1.3            | 59.2<br>± 5.5   | 19.9<br>± 3        | 33.6<br>± 3.4          | 40.7<br>± 4.2 | 4300<br>± 636                       | 92.6 ±<br>11.9  | 248 ± 60       | 0.6                       |
|           | MA-κ-<br>CA-<br>BSNP | 7.0 ±<br>2.4                    | 13.5 ± 3                 | 58.5<br>± 8.7   | 19.1<br>± 2.8      | 32.8<br>± 4.1          | 41.1<br>± 5.6 | 4300<br>± 708                       | 75.9 ±<br>15.6  | 285.6 ±<br>70  | 0.6                       |
| Day<br>21 | SHAM                 | 7.3 ±<br>3.1                    | 14.6 ±<br>3.8            | 57.1<br>± 8.7   | 19.8<br>± 2.8      | 34.8<br>± 4.0          | 41.9<br>± 7.8 | 5200<br>± 800                       | 62.5 ±<br>20.8  | 260.9 ±<br>80  | 0.16                      |
|           | MA-κ-<br>CA          | 6.9 ±<br>2.8                    | 15.3 ±<br>4.0            | 52 ±<br>6.7     | 18.6<br>±3.6       | 31.8<br>± 5.1          | 39 ±<br>8.0   | 4200<br>± 575                       | 105.2 ±<br>18.0 | 272.7 ±<br>89  | 0.16                      |
|           | MA-κ-<br>CA-<br>BSNP | 7.8 ±<br>3.1                    | 15.1 ±<br>3.8            | 58.2<br>± 8.0   | 17.4<br>± 2.4      | 33.4<br>± 6.2          | 45.2<br>± 7.0 | 3800<br>± 835                       | 91.8 ±<br>22.0  | 293.4 ±<br>70  | 0.21                      |
